# Supplementary material for: Global-PCG-10: a 10 m global map of plastic-covered greenhouses derived from Sentinel-2 in 2020
Source: Copernicus journal article supplement (doi:10.5194/essd-17-5065-2025), 2025-10-01
Supplement: Supplementary file 1 [file essd-17-5065-2025-supplement.pdf]

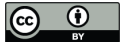

*Supplement of*

## **Global-PCG-10: a 10 m global map of plastic-covered greenhouses derived from Sentinel-2 in 2020**

**Bowen Niu et al.**

*Correspondence to:* Quanlong Feng (fengql@cau.edu.cn)

The copyright of individual parts of the supplement might differ from the article licence.

As shown in Figure S1 (a), the blue grids represent the  $5^{\circ} \times 5^{\circ}$  grids for the PCG classification processing, while the red grids stand for the  $1^{\circ} \times 1^{\circ}$  grids that contain the PCG classification results. Figure S1 (b) shows these nine grids within the yellow circle in Figure S1 (a), and their 'id's are 1713, 1714, 1715, 1785, 1786, 1787, 1857, 1858, and 1859. As shown in Figure S1 (c), no missing grids in 1787, means that all 25 grids contain PCG classification results. Figure S1 (d) shows that in grid 1713, only grids 1, 6, 7, 8, 10, 13, 14, 15, 18, 22, and 23 contain PCG classification results, which means that only above 11  $1^{\circ} \times 1^{\circ}$  grids contain PCG classification results.

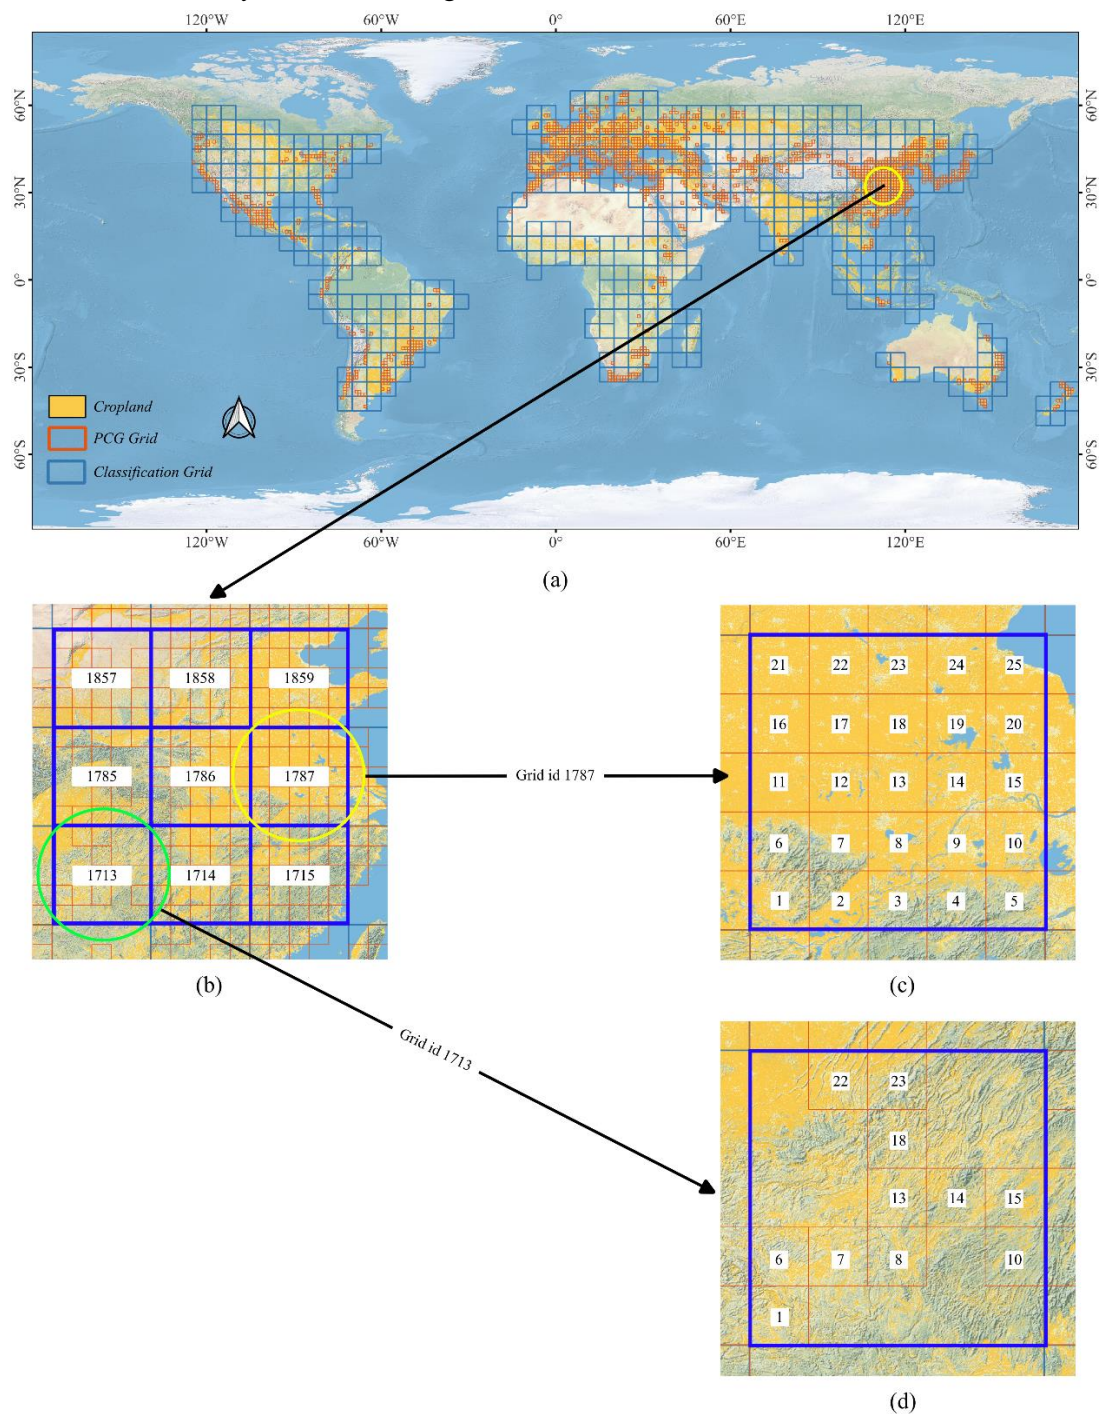

**Figure S1. Data Organization**

The Global-PCG-10 dataset is compressed in *Global\_PCG\_10\_Dataset.zip*. It contains 245  $5^{\circ} \times 5^{\circ}$  grid files, and each of them is named using the grid's 'id' attribute. Within each  $5^{\circ} \times 5^{\circ}$  grid

file, there are  $1^{\circ} \times 1^{\circ}$  TIF files, named in the format *gridID\_subgridID\_PCG\_Result.tif*. Here, *gridID* represents the '*id*' of the  $5^{\circ} \times 5^{\circ}$  grid containing the  $1^{\circ} \times 1^{\circ}$  subgrid, and *subgridID* represents the '*id*' of the  $1^{\circ} \times 1^{\circ}$  grid. Both the *Classification Grid* and the *PCG Grid* are provided in SHP format and compressed in .zip file. The '*id*' number of each Grid is contained in their property table. Additionally, the cropland and PCG area statistic data are contained in the Excel file, *SATA\_Cropland&PCG.xlsx*.
